# Supplementary material for: Lasofoxifene in Postmenopausal Women with Osteoporosis
Source: Atypon-hosted journal article supplement (doi:10.1056/nejmoa0808692), 2010-02-24
Supplement: nejm_cummings_686sa1.pdf [file nejm_cummings_686sa1.pdf]

## Supplementary Appendix

This appendix has been provided by the authors to give readers additional information about their work.

Supplement to: Cummings SR, Ensrud K, Delmas PD, et al. Lasofoxifene in postmenopausal women with osteoporosis. *N Engl J Med* 2010;362:686-96.

**Table A. Rates of adverse events in the PEARL Trial that occurred with less than 10 cases per 1000 person-year difference between placebo and either dose of lasofoxifene and P<0.05 for the comparison for either dose of lasofoxifene with placebo**

| Adverse event*                | Placebo       |                                 | Lasofoxifene 0.25 mg/d |                                 |         | Lasofoxifene 0.5 mg/d |                                 |         |
|-------------------------------|---------------|---------------------------------|------------------------|---------------------------------|---------|-----------------------|---------------------------------|---------|
|                               | No. of Events | No. of Cases per 1000 Person-Yr | No. of Events          | No. of Cases per 1000 Person-Yr | P Value | No. of Events         | No. of Cases per 1000 Person-Yr | P Value |
| Back pain                     | 741           | 57.8                            | 662                    | 51.4                            | 0.015   | 704                   | 54.8                            | 0.260   |
| Hypertension <sup>†</sup>     | 652           | 50.9                            | 542                    | 42.1                            | 0.005   | 558                   | 43.4                            | 0.018   |
| Gastritis                     | 248           | 19.3                            | 216                    | 16.8                            | 0.06    | 200                   | 15.6                            | 0.008   |
| Headache                      | 208           | 16.2                            | 164                    | 12.7                            | 0.018   | 181                   | 14.1                            | 0.156   |
| Insomnia                      | 157           | 12.2                            | 113                    | 8.8                             | 0.011   | 99                    | 7.7                             | 0.001   |
| Atrophic vulvovaginitis       | 130           | 12.6                            | 102                    | 9.9                             | 0.060   | 98                    | 9.5                             | 0.031   |
| Anaemia                       | 140           | 10.9                            | 198                    | 15.4                            | 0.004   | 167                   | 13.0                            | 0.11    |
| Hyperlipidemia                | 127           | 9.9                             | 60                     | 4.7                             | <0.001  | 65                    | 5.1                             | <0.001  |
| Hypercholesterolemia          | 93            | 7.3                             | 24                     | 1.9                             | <0.001  | 31                    | 2.4                             | <0.001  |
| Herpes zoster                 | 83            | 6.5                             | 58                     | 4.5                             | 0.039   | 51                    | 4.0                             | 0.005   |
| Vaginal bleeding <sup>‡</sup> | 36            | 2.8                             | 70                     | 5.4                             | 0.011   | 90                    | 7.0                             | <0.001  |
| Vaginal disorder              | 27            | 2.6                             | 94                     | 9.1                             | <0.001  | 99                    | 9.6                             | <0.001  |
| Vaginal discharge             | 23            | 2.2                             | 70                     | 6.8                             | <0.001  | 68                    | 6.6                             | <0.001  |
| Uterine leiomyoma             | 35            | 3.4                             | 42                     | 4.1                             | 0.42    | 63                    | 6.1                             | 0.004   |
| Lung cancer <sup>‡</sup>      | 4             | 0.3                             | 15                     | 1.2                             | 0.012   | 13                    | 1.0                             | 0.029   |

\* Based on subjects with one or more events.

† Although there were fewer reports of hypertension in the lasofoxifene groups, there were no differences between groups for changes in diastolic or systolic blood pressure (-2.8/-3.8 for placebo, -2.6/-4.0 for 0.5 mg/d, and -2.8/-3.5 for 0.25 mg/d) at 3 years.

‡ Based on a composite of MedDRA preferred terms including squamous cell, adenocarcinoma, and small cell cancers. p-values based on number of subjects with preferred term.

**Table B. Adverse events by MedDRA preferred terms in the PEARL Trial for the combination of lasofoxifene 0.25 and 0.5 mg groups versus placebo that differed with a P-value < 0.05.**

| MedDRA preferred term                | Pooled lasofoxifene incidence (per 1000 subjects) | Placebo incidence (per 1000 subjects) | P-value |
|--------------------------------------|---------------------------------------------------|---------------------------------------|---------|
| Abdominal bruit                      | 1.8                                               | 0.0                                   | 0.04    |
| Anaemia                              | 57.3                                              | 44.2                                  | 0.01    |
| Arthritis reactive                   | 1.4                                               | 3.9                                   | 0.03    |
| Aspartate aminotransferase increased | 17.7                                              | 10.2                                  | 0.007   |
| Back pain                            | 239.5                                             | 259.8                                 | 0.04    |
| Blood alkaline phosphatase increased | 2.6                                               | 10.5                                  | <0.001  |
| Blood bilirubin increased            | 0.2                                               | 2.8                                   | 0.001   |
| Blood calcium increased              | 1.8                                               | 8.1                                   | <0.001  |
| Blood cholesterol increased          | 1.4                                               | 6.3                                   | <0.001  |
| Blood TSH increased                  | 1.9                                               | 0.0                                   | 0.02    |
| Bone pain                            | 24.7                                              | 17.2                                  | 0.03    |
| Carpal tunnel syndrome               | 5.6                                               | 9.8                                   | 0.04    |
| Cervical cyst                        | 3.2                                               | 0.7                                   | 0.03    |
| Cervicitis                           | 10.9                                              | 16.8                                  | 0.02    |
| Colpocele                            | 8.8                                               | 3.9                                   | 0.009   |
| Conjunctival haemorrhage             | 1.9                                               | 4.9                                   | 0.02    |
| Cystocele                            | 44.5                                              | 35.1                                  | 0.04    |
| Dolichocolon                         | 0.0                                               | 2.1                                   | 0.001   |
| Dyslipidaemia                        | 7.7                                               | 13.3                                  | 0.02    |
| Eczema asteatotic                    | 1.8                                               | 0.0                                   | 0.04    |
| Epistaxis                            | 5.1                                               | 9.1                                   | 0.03    |
| Eyelids pruritus                     | 0.4                                               | 1.8                                   | 0.05    |
| Facial pain                          | 0.9                                               | 2.8                                   | 0.04    |
| Foreign body trauma                  | 0.2                                               | 1.8                                   | 0.02    |
| Gastritis                            | 54.7                                              | 69.1                                  | 0.009   |
| Headache                             | 60.5                                              | 72.9                                  | 0.03    |
| Hemicephalalgia                      | 0.4                                               | 1.8                                   | 0.05    |
| Herpes zoster                        | 18.6                                              | 28.4                                  | 0.005   |
| Hydrometra                           | 8.9                                               | 3.9                                   | <0.001  |
| Hypercholesterolaemia                | 9.5                                               | 30.9                                  | <0.001  |
| Hyperhidrosis                        | 15.6                                              | 8.4                                   | 0.006   |
| Hyperlipidaemia                      | 21.2                                              | 43.8                                  | <0.001  |
| Hypertension                         | 161.1                                             | 187.2                                 | 0.003   |
| Hypoesthesia                         | 12.6                                              | 18.2                                  | 0.04    |
| Insomnia                             | 34.2                                              | 50.1                                  | <0.001  |
| Localised infection                  | 6.8                                               | 1.8                                   | 0.001   |
| Malaise                              | 2.3                                               | 5.3                                   | 0.03    |

|                          |      |      |        |
|--------------------------|------|------|--------|
| Nodule on extremity      | 0.4  | 1.8  | 0.05   |
| Pharyngotonsillitis      | 1.8  | 0.0  | 0.04   |
| Phlebitis                | 4.7  | 1.1  | 0.006  |
| Platelet count decreased | 2.6  | 0.4  | 0.03   |
| Psoriasis                | 1.8  | 4.6  | 0.03   |
| Reflux oesophagitis      | 6.0  | 2.1  | 0.01   |
| Sensation of heaviness   | 4.2  | 1.1  | 0.01   |
| Somatisation disorder    | 0.5  | 2.5  | 0.02   |
| Tenosynovitis            | 1.4  | 4.9  | 0.005  |
| Tinnitus                 | 12.4 | 18.6 | 0.03   |
| Transaminases increased  | 2.3  | 0.4  | 0.04   |
| Trigger finger           | 1.9  | 5.6  | 0.007  |
| Uterine cervical erosion | 7.0  | 3.5  | 0.05   |
| Uterine leiomyoma        | 18.4 | 12.3 | 0.04   |
| Vaginal discharge        | 66.4 | 28.4 | <0.001 |
| Vaginal disorder         | 22.8 | 8.1  | <0.001 |
| Vitreous detachment      | 2.3  | 0.4  | 0.05   |
| Vulvovaginitis           | 12.3 | 3.9  | <0.001 |
